# Supplementary material for: Fabrication of collagen scaffolds impregnated with sago starch capped silver nanoparticles suitable for biomedical applications and their physicochemical studies
Source: Royal Society of Chemistry journal article supplement (doi:10.1039/c4cp02554g), 2014-01-01
Supplement: c4cp02554g1.pdf [file c4cp02554g1.pdf]

## Electronic Supplementary Information for

### **Fabrication of collagen scaffolds impregnated with sago starch capped silver nanoparticles suitable for biomedical applications and its physicochemical studies**

**Abhishek Mandal,<sup>a,b</sup> Santhanam Sekar,<sup>b</sup> Kamal Mohamed Seeni Meera,<sup>c</sup> Amitava Mukherjee,<sup>a</sup> Thotapalli P. Sastry,<sup>\*b</sup> Asit Baran Mandal,<sup>\*b,c,d</sup>**

<sup>a</sup>Centre for Nano-Biotechnology, School of Bio-Sciences and Technology, VIT University, Vellore 632014, India.

<sup>b</sup>Bio-Products Laboratory, Council of Scientific and Industrial Research (CSIR)-Central Leather Research Institute (CLRI), Adyar, Chennai 600020, India.

<sup>c</sup>Polymer Division, CSIR-CLRI, Adyar, Chennai 600020, India.

<sup>d</sup>Chemical Laboratory, CSIR-CLRI, Adyar, Chennai 600020, India.

\*Email: [abmandal@hotmail.com](mailto:abmandal@hotmail.com), [abmandal@clri.res.in](mailto:abmandal@clri.res.in) (A. B. Mandal),  
[sastrytp@hotmail.com](mailto:sastrytp@hotmail.com) (T. P. Sastry)

Fax #: +91-44-24912150/24911589; Tel #: +91-44-24910846/24910897

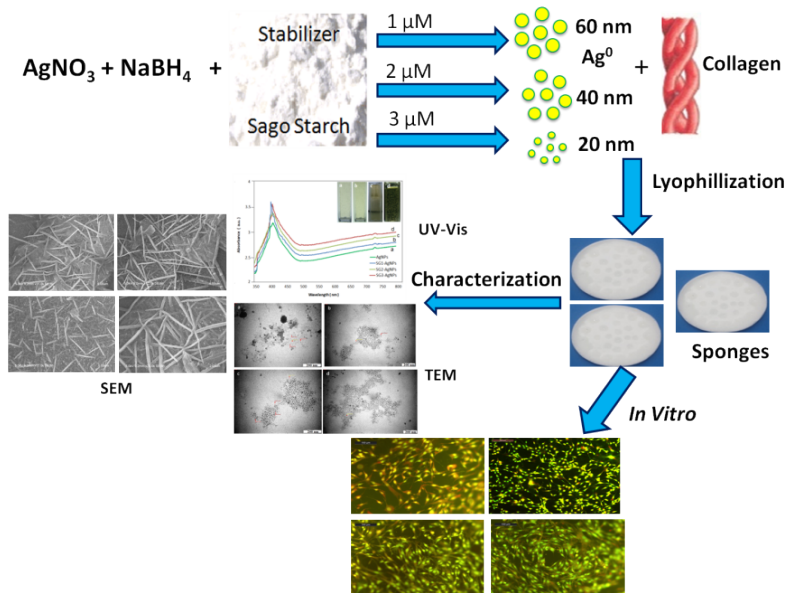

**Fig. S1.** Schematic representation of the fabrication and characterization of biocompatible collagen scaffolds impregnated with sago starch capped silver nanoparticles.

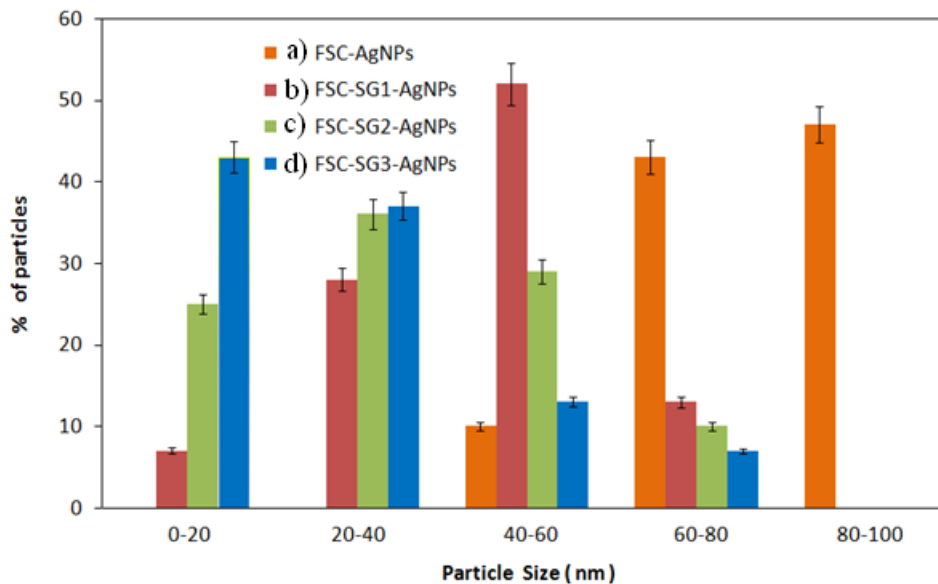

**Fig. S2.** Particle size analysis of synthesized silver nanoparticles: a) bare, b) 1  $\mu\text{M}$ , c) 2  $\mu\text{M}$  and d) 3  $\mu\text{M}$  sago starch, respectively.

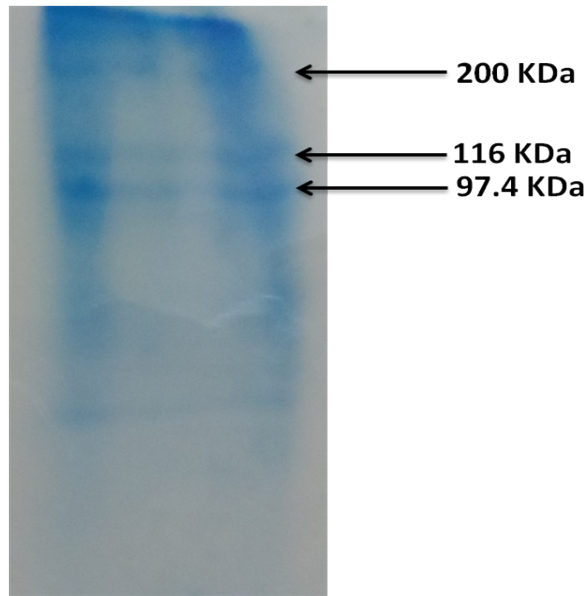

**Fig. S3.** SDS-PAGE of collagen isolated from the Lates Calcarifer fish scales.

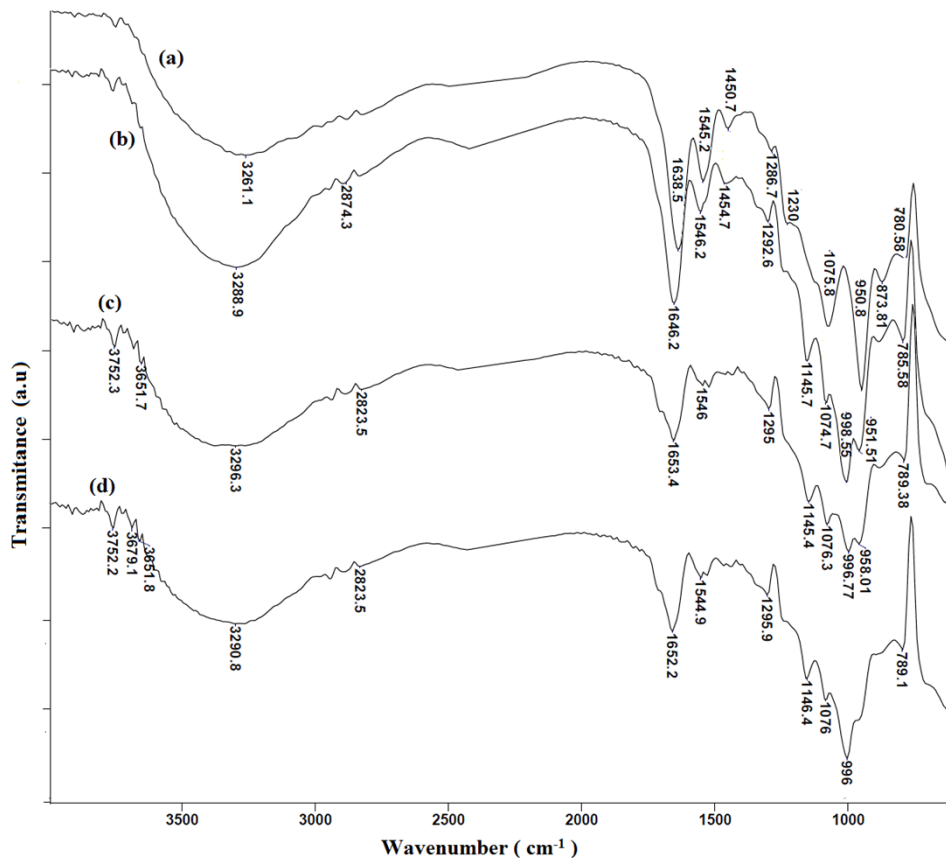

**Fig. S4.** ATR-FTIR spectra of various collagen based scaffolds: a) FSC-AgNPs, b) FSC-SG1-AgNPs, c) FSC-SG2-AgNPs and d) FSC-SG3-AgNPs, respectively.

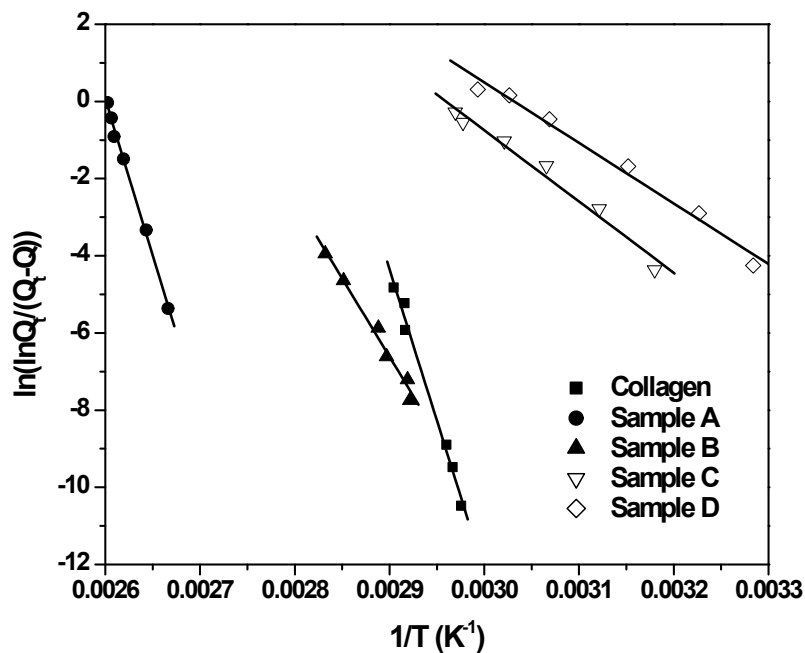

**Fig. S5.** Arrhenius plot for the first melting region ( $T_{m1}$ ) for the prepared collagen and collagen-based scaffolds A, B, C, and D refer to the same as that in Figure 2.

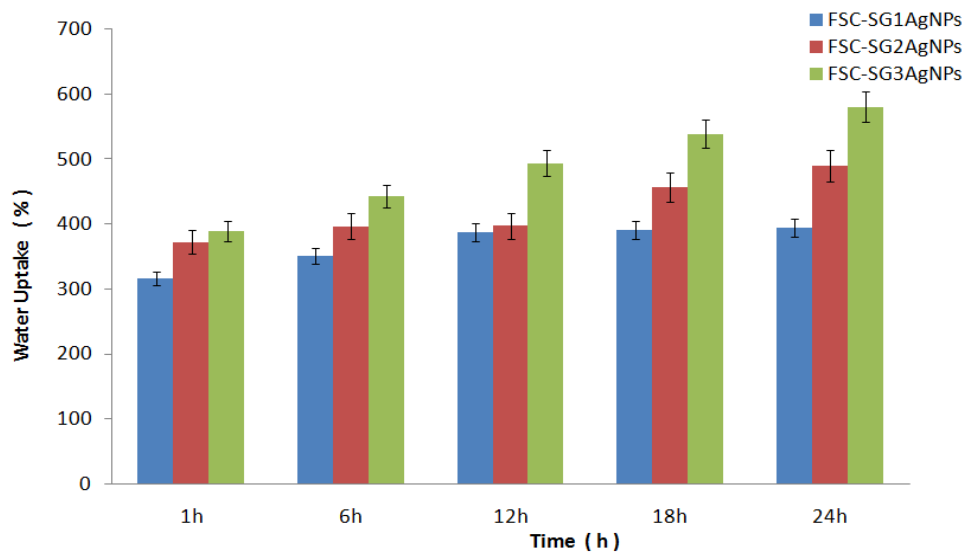

**Fig. S6.** The water uptake of the prepared scaffolds: a) FSC-SG1-AgNPs, b) FSC-SG1-AgNPs and c) FSC-SG1-AgNPs, respectively.

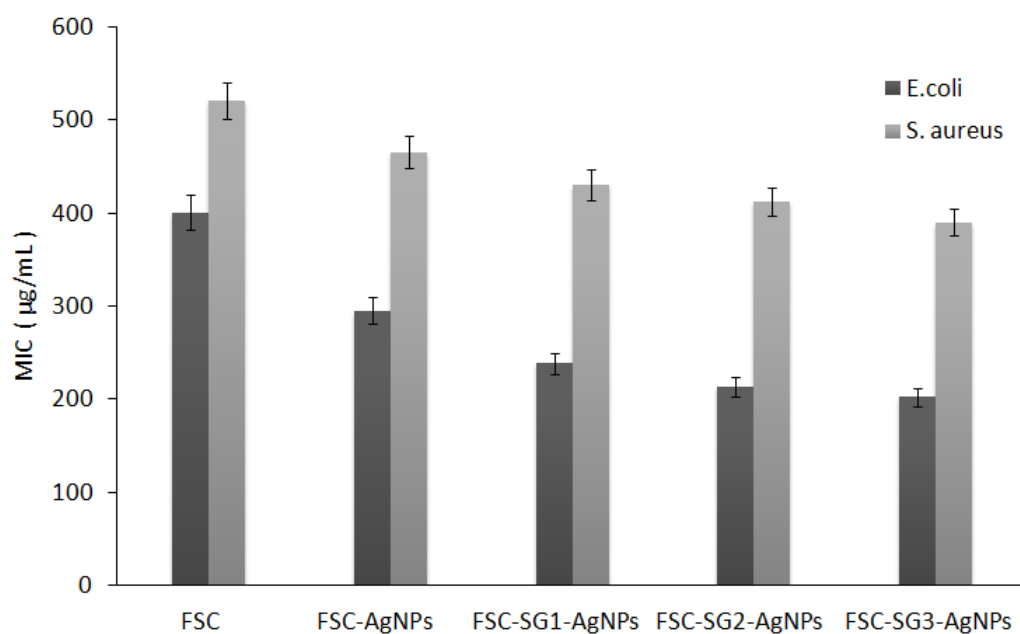

**Fig. S7.** The minimum inhibitory concentration (MIC) for collagen based scaffolds: **FSC**, FSC-AgNPs; FSC-SG1-AgNPs; FSC-SG2-AgNPs; and FSC-SG3-AgNPs tested against both gram positive and negative bacterial strains, respectively.

**Table S1:** The Zeta potential of AgNPs, and AgNPs capped by different concentrations of sago starch keeping the Ag concentration (0.01M) fixed during synthesis.

| <b>Systems</b> | <b>Zeta potential (mV)</b> |
|----------------|----------------------------|
| AgNPs          | -15.2±0.5                  |
| SG1-AgNPs      | -20.1±0.8                  |
| SG2-AgNPs      | -21.4±0.6                  |
| SG3-AgNPs      | -23.3±0.5                  |

**Table S2:** The ATR-FTIR spectroscopic data of uncapped AgNPs and different concentrations of sago starch capped AgNPs impregnated in fish scale collagen scaffolds (FSC) at 20°C

| <b>Wavenumber (cm<sup>-1</sup>)</b> |                      |                      |                      |
|-------------------------------------|----------------------|----------------------|----------------------|
| <b>FSC-AgNPs</b>                    | <b>FSC-SG1-AgNPs</b> | <b>FSC-SG2-AgNPs</b> | <b>FSC-SG3-AgNPs</b> |
| 3753                                | 3753                 | 3752                 | 3752                 |
| 3261                                | 3288                 | 3296                 | 3291                 |
|                                     | 2926                 | 2927                 | 2929                 |
| 2878                                | 2874                 | 2824                 | 2823                 |
| 1638                                | 1646                 | 1653                 | 1652                 |
| 1545                                | 1546                 | 1546                 | 1545                 |
| 1450                                | 1454                 | 1454                 | 1454                 |
| 1286                                | 1292                 | 1295                 | 1296                 |
| 1230                                | 1145                 | 1146                 | 1147                 |
| 1075                                | 1074                 | 1075                 | 1076                 |
| 950                                 | 989                  | 997                  | 996                  |
| 873                                 | 951                  | 958                  | 961                  |
| 780                                 | 786                  | 789                  | 789                  |

**Table S3:** Thermal parameters of the scaffolds: collagen, collagen/silver nanoparticles and collagen containing different concentrations of starch capped silver nanoparticles respectively.

| System                    | Thermal properties     |                         |             |        |                            |                |                         |                         |
|---------------------------|------------------------|-------------------------|-------------|--------|----------------------------|----------------|-------------------------|-------------------------|
|                           | T <sub>d</sub><br>(°C) | T <sub>m1</sub><br>(°C) | ΔH<br>(J/g) | Slope  | E <sub>a</sub><br>(kJ/mol) | R <sup>2</sup> | T <sub>m2</sub><br>(°C) | T <sub>m3</sub><br>(°C) |
| Fish scale collagen (FSC) | 38                     | 91                      | 69          | -78356 | 650                        | 0.9902         | 122                     | 225                     |
| FSC-AgNPs                 | 52                     | 121                     | 94          | -81074 | 675                        | 0.9962         | 156                     | 227                     |
| FSC-SG1AgNPs              | 50                     | 103                     | 74          | -40529 | 337                        | 0.9829         | 146                     | 225                     |
| FSC-SG2AgNPs              | 45                     | 101                     | 34          | -18675 | 155                        | 0.9780         | 145                     | 220                     |
| FSC-SG3AgNPs              | 43                     | 100                     | 28          | -15699 | 131                        | 0.9841         | 144                     | 216                     |

T<sub>d</sub>= denaturation temperature; T<sub>m</sub>= melting temperature; ΔH= enthalpy change; E<sub>a</sub>= activation energy and R<sup>2</sup>= correlation coefficient.

**Table S4:** Thermogravimetric analysis of collagen, collagen-AgNPs and collagen-SG-AgNPs systems, respectively

| System            | Weight loss% | Temperature Range |
|-------------------|--------------|-------------------|
|                   | 11.6         | 20-80             |
| Collagen          | 5.7          | 80-255            |
|                   | 46.4         | 255-361           |
|                   | 17.0         | 361-568           |
|                   | 1.5          | 20-90             |
| Collagen-AgNPs    | 12.5         | 90-190            |
|                   | 24.5         | 190-395           |
|                   | 6.0          | 395-550           |
|                   | 1.8          | 20-88             |
| Collagen-SG1AgNPs | 11.2         | 88-188            |
|                   | 27.0         | 188-315           |
|                   | 16.0         | 315-512           |
|                   | 2.5          | 20-85             |
| Collagen-SG2AgNPs | 9.0          | 85-180            |
|                   | 27.0         | 180-312           |
|                   | 16.0         | 312-500           |
|                   | 2.6          | 20-95             |
| Collagen-SG3AgNPs | 9.5          | 95-200            |
|                   | 29.0         | 200-297           |
|                   | 14.5         | 297-445           |

**Table S5:** Porosity of the collagen scaffolds impregnated with different concentration of sago starch capped silver nanoparticles. The values were expressed as mean  $\pm$  standard error (n=3).

| Scaffold Composition | Porosity (%)   |
|----------------------|----------------|
| FSC-SG1-AgNPs        | 86.8 $\pm$ 2.1 |
| FSC-SG2-AgNPs        | 89.6 $\pm$ 1.7 |
| FSC-SG3-AgNPs        | 91.3 $\pm$ 1.3 |
